# Supplementary material for: Quantum interference and structure-dependent orbital-filling effects on the thermoelectric properties of quantum dot molecules
Source: Royal Society of Chemistry journal article supplement (doi:10.1039/c5cp02657a), 2015-01-01
Supplement: c5cp02657a1.pdf [file c5cp02657a1.pdf]

## Supplemental Material to the paper "Quantum interference and structure-dependent orbital-filling effects on the thermoelectric properties of quantum dot molecules"

Chih-Chieh Chen

*Department of Physics, University of Illinois at Urbana-Champaign, Urbana, Illinois 61801, USA and  
Research Center for Applied Sciences, Academic Sinica, Taipei, 11529 Taiwan*

David M T Kuo\*

*Department of Electrical Engineering and Department of Physics,  
National Central University, Chungli, 320 Taiwan*

Yia-chung Chang†

*Research Center for Applied Sciences, Academic Sinica, Taipei, 11529 Taiwan and  
Department of Physics, National Cheng-Kung University, Tainan, 70101 Taiwan*

(Dated: June 4, 2015)

### I. DOUBLE QUANTUM DOT

Figure S shows the electrical conductance ( $G_e$ ), Seebeck coefficient ( $S$ ) and power factor (PF) of DQD as functions of  $V_g$  at different temperatures. Physical parameters are the same as those for Fig. 5. For DQD, the four  $G_e$  peaks correspond to  $\epsilon_1 = E_0 - t_{LR}$ ,  $\epsilon_2 = E_0 + t_{LR} + \frac{U_0 + U_{LR}}{2} - \frac{1}{2}\sqrt{(U_0 - U_{LR})^2 + 16t_{LR}^2}$ ,  $\epsilon_3 = E_0 - t_{LR} + \frac{U_0 + 3U_{LR}}{2} + \frac{1}{2}\sqrt{(U_0 - U_{LR})^2 + 16t_{LR}^2}$  and  $\epsilon_4 = E_0 + U_0 + 2U_{LR} + t_{LR}$ . The  $G_e$  spectrum shows a mirror-symmetry behavior with respect to the middle of the Coulomb gap. Due to the symmetry of DQD structure, the PF spectrum also shows the mirror symmetry. The maximum PF occurs at either orbital-depletion ( $N \leq 1$ ) or orbital-filling ( $N = 4$ ) condition for DQD. Note that unlike  $G_e$  and PF,  $S$  does not show the mirror symmetry.

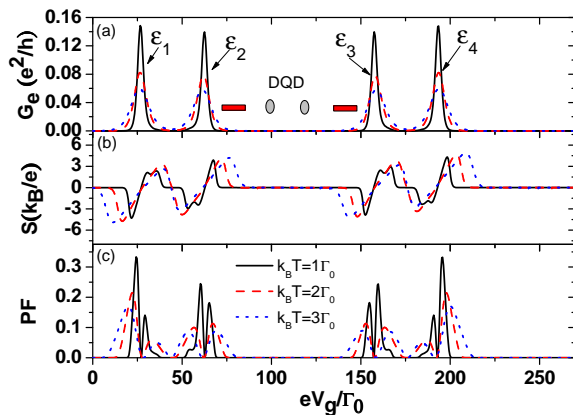

Figure S 1: Electrical conductance ( $G_e$ ), Seebeck coefficient ( $S$ ) and power factor of DQD as functions of QD energy ( $E_\ell = E_0 = E_F + 30\Gamma_0 - eV_g$ ) for different temperatures. Other physical parameters are the same as those of Fig. 5.

---

\* mtkuo@ee.ncu.edu.tw

† yiachang@gate.sinica.edu.tw
